# Supplementary material for: Isolation and structural characterization of an optically active intermediate in the oxidative addition of methyl iodide on a rhodium(i) centre
Source: Royal Society of Chemistry journal article supplement (doi:10.1039/b409134e), 2004-01-01
Supplement: b409134e-2.pdf [file b409134e-2.pdf]

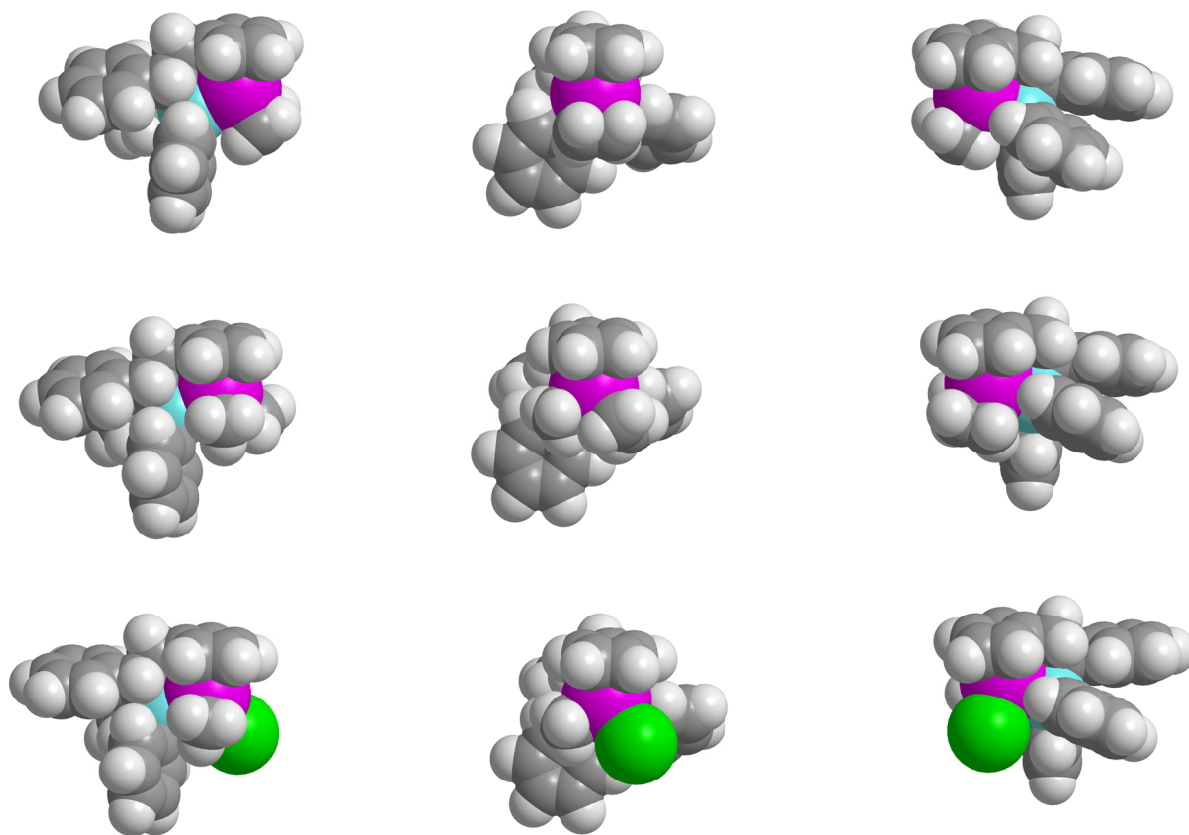

Space-filling representation of 1 (top), 3 (middle), and 2a (below). Side views on the left and on the right; in the middle, the front view. Rhodium = purple, phosphorus = light blue, iodine = green.
